# Supplementary material for: Construction of Hollow Co3O4@ZnIn2S4 p-n Heterojunctions for Highly Efficient Photocatalytic Hydrogen Production
Source: MDPI journal article supplement (doi:10.3390/nano13040758), 2023-02-17

**Table S1. Comparison with other catalysts**

| Semiconductor                                                          | Solvothermal method                                             | Morphology                                                                                | Sacrificial reagent                               | Light source (nm)                              | Optimal hydrogen evolution ( $\mu\text{mol}\cdot\text{g}^{-1}\cdot\text{h}^{-1}$ )                      | Refs. |
|------------------------------------------------------------------------|-----------------------------------------------------------------|-------------------------------------------------------------------------------------------|---------------------------------------------------|------------------------------------------------|---------------------------------------------------------------------------------------------------------|-------|
| ZnIn <sub>2</sub> S <sub>4</sub> @NH <sub>2</sub> -MIL-125(Ti)         | Solvothermal method                                             | Micropores and mesopores                                                                  | Na <sub>2</sub> S/Na <sub>2</sub> SO <sub>3</sub> | 300 W Xe lamp<br>$\lambda > 420 \text{ nm}$    | 2204.2 40 wt% NH <sub>2</sub> -MIL-125(Ti)                                                              | 1     |
| g-C <sub>3</sub> N <sub>4</sub> @ZnIn <sub>2</sub> S <sub>4</sub>      | Solvothermal method                                             | 2D/2D g-C <sub>3</sub> N <sub>4</sub> nanosheet@ZnIn <sub>2</sub> S <sub>4</sub> nanoleaf | Triethanolamine                                   | 300 W Xe lamp<br>$\lambda > 420 \text{ nm}$    | 2780                                                                                                    | 2     |
| Co(dmgh) <sub>2</sub> pyC/ZnIn <sub>2</sub> S <sub>4</sub>             | Impregnating method                                             | Microspheres                                                                              | Triethanolamine                                   | 300 W Xe lamp<br>$\lambda > 420 \text{ nm}$    | 3840<br>3.0 wt%<br>Co(dmgh) <sub>2</sub> pyCl/ZnIn <sub>2</sub> S <sub>4</sub>                          | 3     |
| CQDs/ZnIn <sub>2</sub> S <sub>4</sub>                                  | Microwave hydrothermal method                                   | Microspheres                                                                              | N/A                                               | 350 W Xe lamp<br>$\lambda > 400 \text{ nm}$    | 1032.2                                                                                                  | 4     |
| MoS <sub>2</sub> /ZnIn <sub>2</sub> S <sub>4</sub>                     | Hydrothermal method                                             | Nanoparticles                                                                             | Na <sub>2</sub> S/Na <sub>2</sub> SO <sub>3</sub> | 300 W Xe lamp<br>$\lambda > 420 \text{ nm}$    | 2080<br>0.5 wt%<br>MoS <sub>2</sub> /ZnIn <sub>2</sub> S <sub>4</sub>                                   | 5     |
| In <sub>2</sub> S <sub>3</sub> /ZnIn <sub>2</sub> S <sub>4</sub>       | Ion-exchange method                                             | Microflowers                                                                              | Na <sub>2</sub> S/K <sub>2</sub> SO <sub>3</sub>  | 300 W Xe lamp<br>$\lambda \geq 420 \text{ nm}$ | 678                                                                                                     | 6     |
| CdS/ZnFe <sub>2</sub> O <sub>4</sub> /ZnIn <sub>2</sub> S <sub>4</sub> | Solvothermal processes & Ionic layer adsorption-reaction method | Nanosheet stereoscopic films                                                              | Na <sub>2</sub> S/Na <sub>2</sub> SO <sub>3</sub> | 300 W Xe lamp<br>$\lambda > 420 \text{ nm}$    | 79.0 $\mu\text{mol h}^{-1}$<br>1-CdS/ZnFe <sub>2</sub> O <sub>4</sub> /ZnIn <sub>2</sub> S <sub>4</sub> | 7     |

- [1] H. Liu, J. Zhang, D. Ao, Construction of heterostructured ZnIn<sub>2</sub>S<sub>4</sub>@NH<sub>2</sub>-MIL-125(Ti) nanocomposites for visible-light-driven H<sub>2</sub> production, Appl. Catal. B Environ. 221 (2018) 433–442.
- [2] B. Lin, H. Li, H. An, W. Hao, J. Wei, Y. Dai, C. Ma, G. Yang, Preparation of 2D/2D g-C<sub>3</sub>N<sub>4</sub> nanosheet@ZnIn<sub>2</sub>S<sub>4</sub> nanoleaf heterojunctions with well-designed high-speed charge transfer nanochannels towards high-efficiency photocatalytic hydrogen evolution, Appl. Catal. B Environ. 220 (2018) 542–552.
- [3] Y. Gao, H. Lin, S. Zhang, Z. Li, Co(dmgh)<sub>2</sub>pyCl as a noble-metal-free co-catalyst for highly efficient photocatalytic hydrogen evolution over hexagonal ZnIn<sub>2</sub>S<sub>4</sub>, RSC

- Adv. 6 (2016) 6072–6076.
- [4] Q. Li, C. Cui, H. Meng, J. Yu, Visible-light photocatalytic hydrogen production activity of ZnIn<sub>2</sub>S<sub>4</sub> microspheres using carbon quantum dots and platinum as dual co-catalysts, *Chem. Asian. J.* 9 (2014) 1766–1770.
- [5] T. Huang, W. Chen, T. Liu, Q. Hao, X. Liu, ZnIn<sub>2</sub>S<sub>4</sub> hybrid with MoS<sub>2</sub>: a non-noble metal photocatalyst with efficient photocatalytic activity for hydrogen evolution, *Powder. Technol.* 315 (2017) 157–162.
- [6] Z. Mei, S. Ouyang, D. Tang, T. Kako, D. Golberg, J. Ye, An ion-exchange route for the synthesis of hierarchical In<sub>2</sub>S<sub>3</sub>/ZnIn<sub>2</sub>S<sub>4</sub> bulk composite and its photocatalytic activity under visible-light irradiation, *Dalton Trans.* 42 (2013) 2687–2690.
- [7] Y. Chen, G. Tian, W. Zhou, Y. Xiao, J. Wang, X. Zhang, H. Fu, Enhanced photo-generated carrier separation in CdS quantum dot sensitized ZnFe<sub>2</sub>O<sub>4</sub>/ZnIn<sub>2</sub>S<sub>4</sub> nanosheet stereoscopic films for exceptional visible light photocatalytic H<sub>2</sub> evolution performance, *Nanoscale* 9 (2017) 5912–5921.

**Figure S1. TG results of the Co<sub>3</sub>O<sub>4</sub>(20)@ZIS**

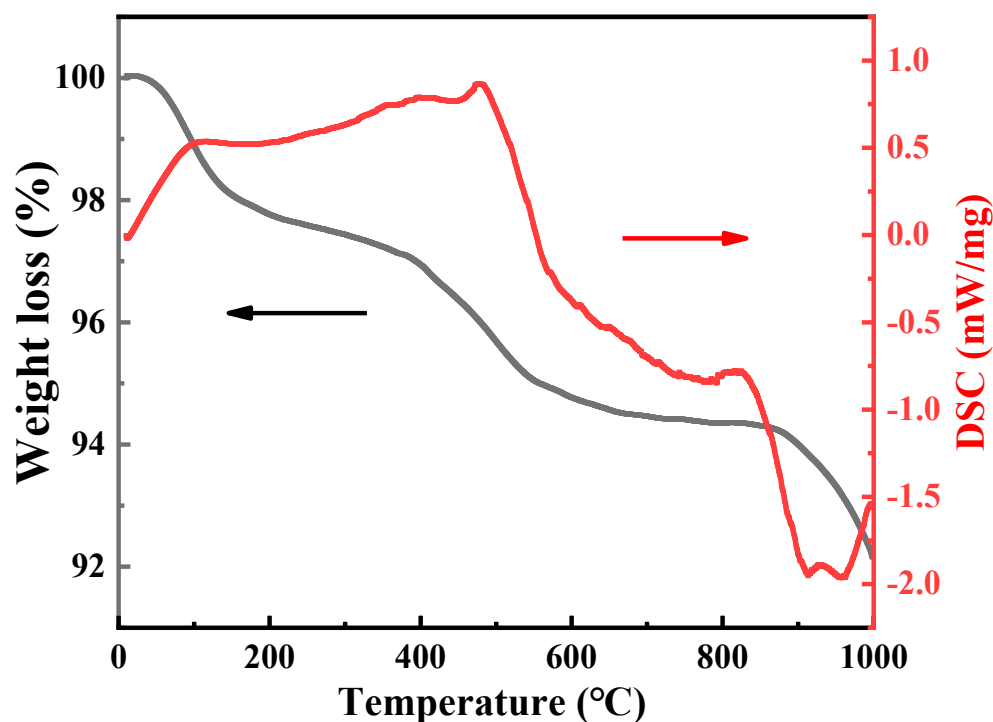

Figure S2. Three cycles of experiment of the  $\text{Co}_3\text{O}_4(20)\text{@ZIS}$

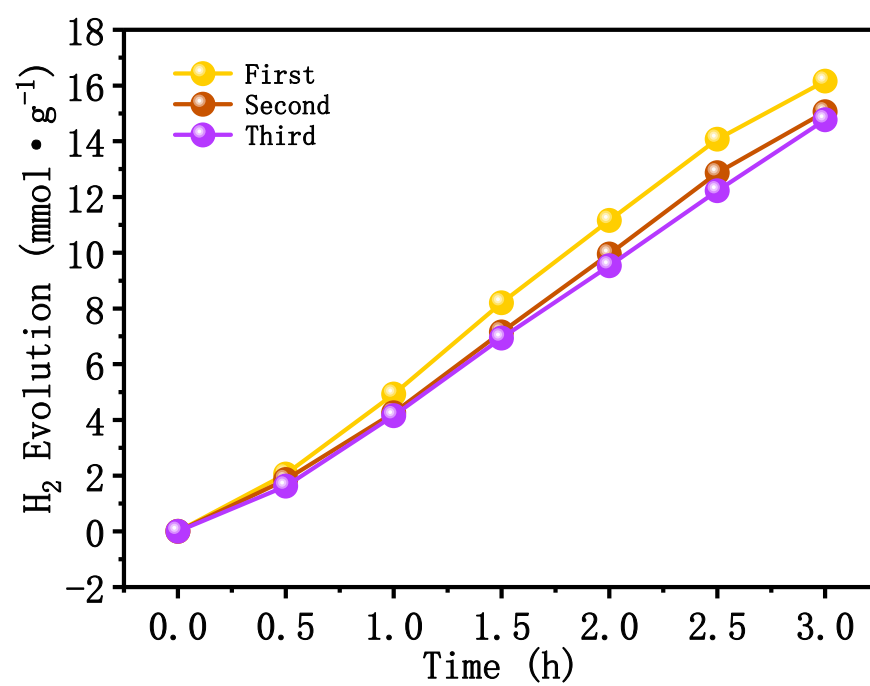

Supplement: s1 [file s1]
